# Supplementary material
Source: MDPI journal article supplement (https://www.mdpi.com/2073-4352/12/8/1016)
Supplement: s1 [file s1]

# Supplementary Materials: New Bioprecursor Prodrugs of Sulfadiazine: Synthesis, X-Ray structure and Hirshfeld Analysis

Mezna Saleh Altowyan <sup>1</sup>, Saied M. Soliman <sup>2</sup>, Magda M. F. Ismail <sup>3</sup>, Matti Haukka <sup>4</sup>, Assem Barakat <sup>5,\*</sup> and Mohammed Salah Ayoup <sup>2,\*</sup>

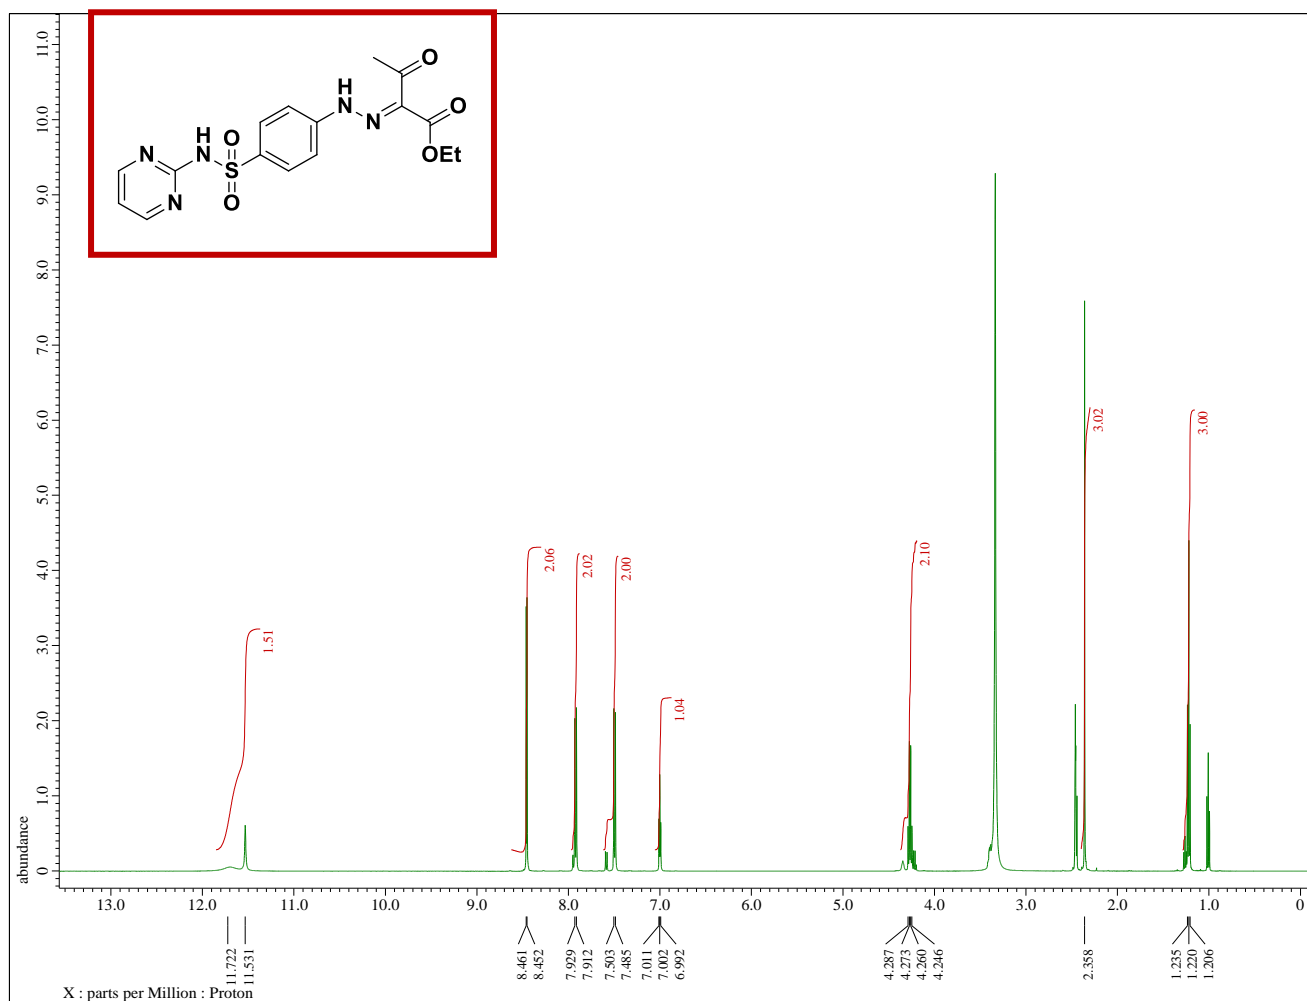

**Figure S1:** <sup>1</sup>H NMR of 3 (DMSO-*d*<sub>6</sub>)

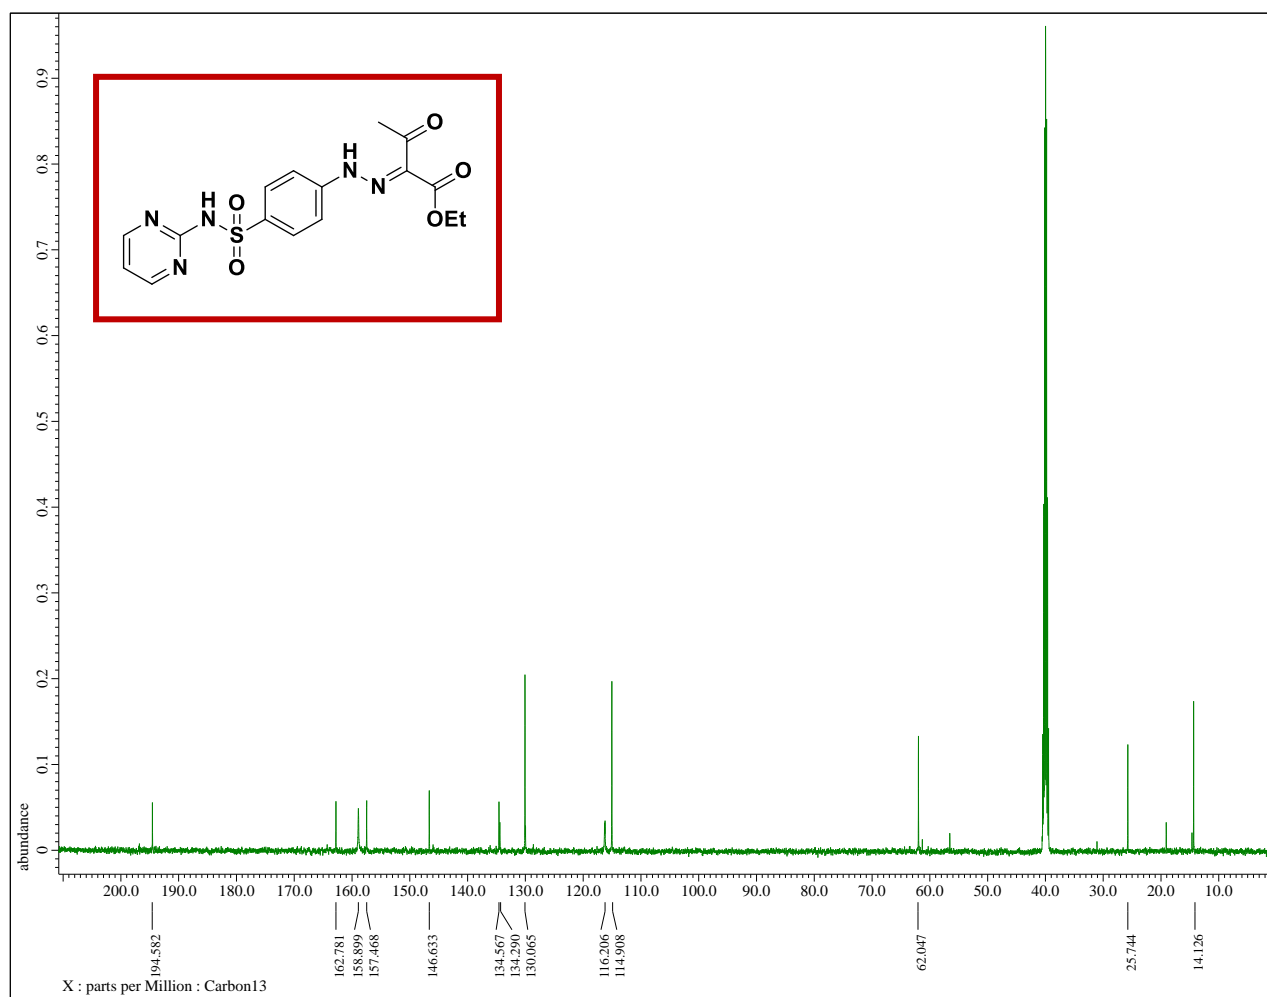

**Figure S2:**  $^{13}\text{C}$ NMR of **3** ( $\text{DMSO-d}_6$ )

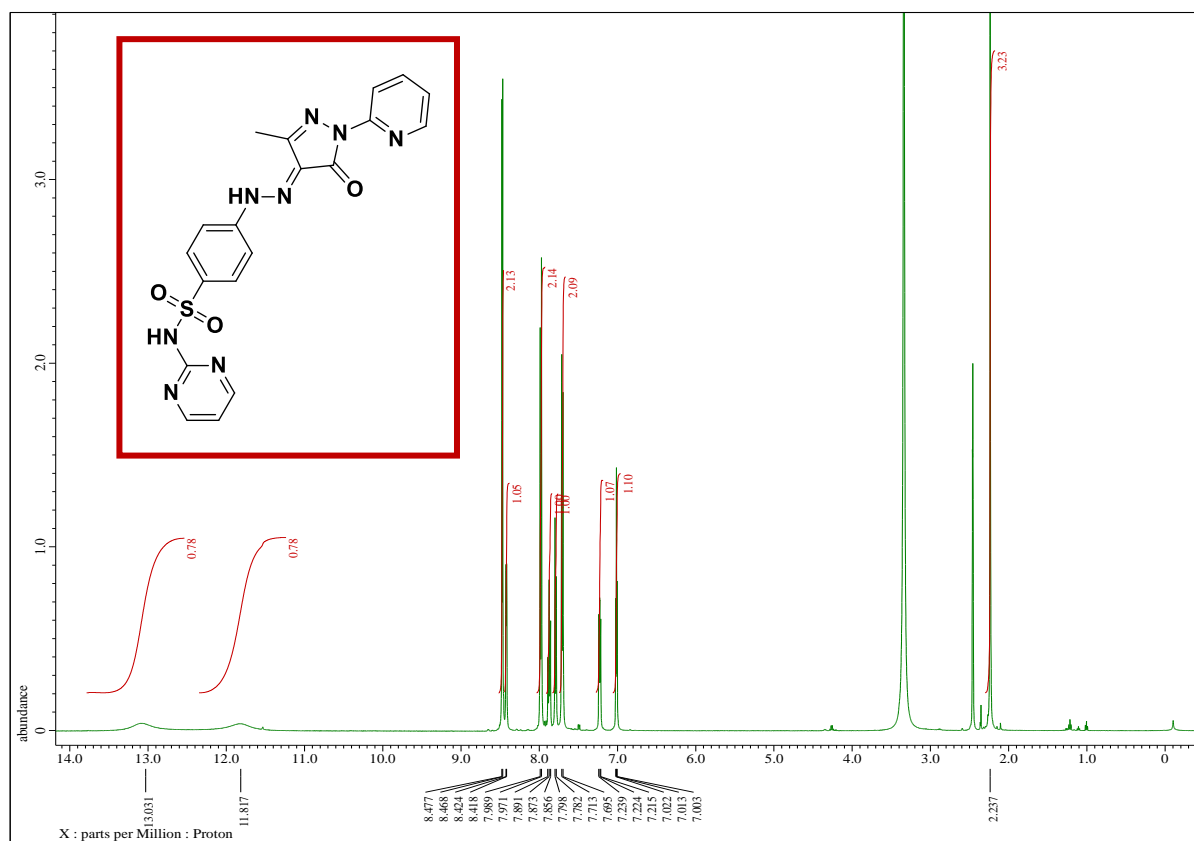Figure S3:  $^1\text{H}$ NMR of 5a (DMSO- $d_6$ )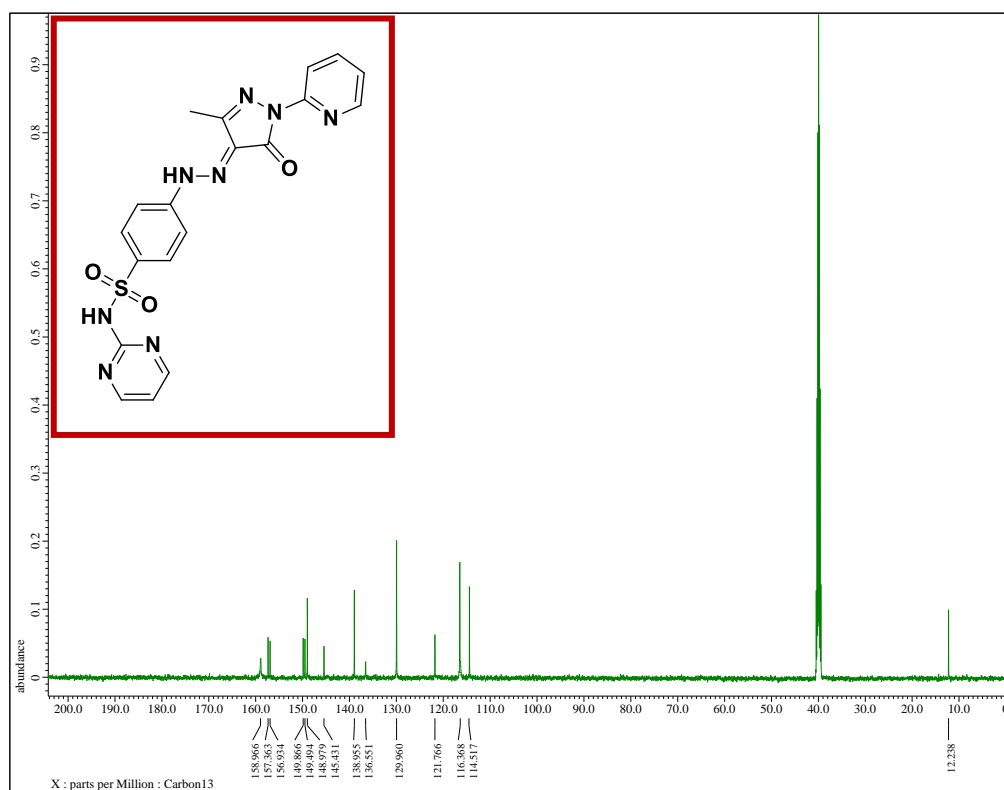Figure S4:  $^{13}\text{C}$ NMR of 5 (DMSO- $d_6$ )

**Table S1** The calculated geometric parameters of **5<sup>a</sup>**.

| Parameter       | Calc  | Exp   | Parameter          | Calc    | Exp     |
|-----------------|-------|-------|--------------------|---------|---------|
| <b>R(1-3)</b>   | 1.465 | 1.433 | <b>A(3-1-4)</b>    | 121.932 | 118.696 |
| <b>R(1-4)</b>   | 1.459 | 1.426 | <b>A(3-1-10)</b>   | 101.858 | 103.466 |
| <b>R(1-10)</b>  | 1.71  | 1.634 | <b>A(3-1-34)</b>   | 108.485 | 109.687 |
| <b>R(1-34)</b>  | 1.784 | 1.76  | <b>A(4-1-10)</b>   | 110.129 | 110.776 |
| <b>R(2-22)</b>  | 1.241 | 1.233 | <b>A(4-1-34)</b>   | 108.47  | 108.384 |
| <b>R(5-13)</b>  | 1.337 | 1.341 | <b>A(10-1-34)</b>  | 104.569 | 104.95  |
| <b>R(5-21)</b>  | 1.332 | 1.338 | <b>A(1-10-39)</b>  | 126.514 | 125.517 |
| <b>R(6-7)</b>   | 1.409 | 1.411 | <b>A(1-10-47)</b>  | 111.816 | 115.975 |
| <b>R(6-21)</b>  | 1.419 | 1.407 | <b>A(1-34-32)</b>  | 118.999 | 118.308 |
| <b>R(6-22)</b>  | 1.383 | 1.386 | <b>A(1-34-35)</b>  | 119.76  | 120.387 |
| <b>R(7-24)</b>  | 1.301 | 1.301 | <b>A(2-22-6)</b>   | 129.311 | 128.141 |
| <b>R(8-9)</b>   | 1.319 | 1.315 | <b>A(2-22-23)</b>  | 126.924 | 127.952 |
| <b>R(8-23)</b>  | 1.308 | 1.309 | <b>A(13-5-21)</b>  | 117.564 | 116.218 |
| <b>R(9-29)</b>  | 1.397 | 1.406 | <b>A(5-13-14)</b>  | 115.574 | 117.878 |
| <b>R(10-39)</b> | 1.389 | 1.387 | <b>A(5-13-15)</b>  | 123.885 | 124.241 |
| <b>R(11-39)</b> | 1.342 | 1.333 | <b>A(5-21-6)</b>   | 115.929 | 115.303 |
| <b>R(11-40)</b> | 1.335 | 1.339 | <b>A(5-21-19)</b>  | 123.767 | 124.204 |
| <b>R(12-39)</b> | 1.338 | 1.332 | <b>A(7-6-21)</b>   | 119.479 | 119.172 |
| <b>R(12-44)</b> | 1.336 | 1.336 | <b>A(7-6-22)</b>   | 112.047 | 111.726 |
| <b>R(13-15)</b> | 1.393 | 1.373 | <b>A(6-7-24)</b>   | 107.796 | 107.33  |
| <b>R(15-17)</b> | 1.395 | 1.373 | <b>A(21-6-22)</b>  | 128.474 | 128.949 |
| <b>R(17-19)</b> | 1.39  | 1.38  | <b>A(6-21-19)</b>  | 120.304 | 120.49  |
| <b>R(19-21)</b> | 1.406 | 1.388 | <b>A(6-22-23)</b>  | 103.764 | 103.907 |
| <b>R(22-23)</b> | 1.473 | 1.452 | <b>A(7-24-23)</b>  | 110.884 | 110.85  |
| <b>R(23-24)</b> | 1.449 | 1.441 | <b>A(7-24-25)</b>  | 121.854 | 122.507 |
| <b>R(24-25)</b> | 1.492 | 1.484 | <b>A(9-8-23)</b>   | 117.447 | 117.999 |
| <b>R(29-30)</b> | 1.404 | 1.38  | <b>A(8-9-29)</b>   | 121.578 | 118.855 |
| <b>R(29-37)</b> | 1.404 | 1.388 | <b>A(8-9-46)</b>   | 117.765 | 119.327 |
| <b>R(30-32)</b> | 1.388 | 1.38  | <b>A(8-23-22)</b>  | 127.431 | 128.26  |
| <b>R(32-34)</b> | 1.398 | 1.385 | <b>A(8-23-24)</b>  | 127.061 | 125.531 |
| <b>R(34-35)</b> | 1.396 | 1.377 | <b>A(29-9-46)</b>  | 120.656 | 121.07  |
| <b>R(35-37)</b> | 1.389 | 1.388 | <b>A(9-29-30)</b>  | 121.683 | 120.934 |
| <b>R(40-42)</b> | 1.394 | 1.375 | <b>A(9-29-37)</b>  | 117.835 | 118.082 |
| <b>R(42-44)</b> | 1.392 | 1.377 | <b>A(9-46-2)</b>   | 135.313 | 134.246 |
|                 |       |       | <b>A(39-10-47)</b> | 115.405 | 118.152 |
|                 |       |       | <b>A(10-39-11)</b> | 114.695 | 114.618 |
|                 |       |       | <b>A(10-39-12)</b> | 117.974 | 117.457 |
|                 |       |       | <b>A(39-11-40)</b> | 115.558 | 115.008 |
|                 |       |       | <b>A(11-39-12)</b> | 127.298 | 127.923 |
|                 |       |       | <b>A(11-40-41)</b> | 116.08  | 118.652 |

|  |             |         |         |
|--|-------------|---------|---------|
|  | A(11-40-42) | 122.737 | 122.688 |
|  | A(39-12-44) | 115.487 | 114.736 |
|  | A(12-44-42) | 122.866 | 123.104 |
|  | A(12-44-45) | 116.058 | 118.452 |
|  | A(14-13-15) | 120.541 | 117.88  |
|  | A(13-15-16) | 120.709 | 121.038 |
|  | A(13-15-17) | 117.635 | 117.936 |
|  | A(16-15-17) | 121.656 | 121.026 |
|  | A(15-17-18) | 120.673 | 119.886 |
|  | A(15-17-19) | 119.762 | 120.231 |
|  | A(18-17-19) | 119.565 | 119.882 |
|  | A(17-19-20) | 122.062 | 121.43  |
|  | A(17-19-21) | 117.386 | 117.147 |
|  | A(20-19-21) | 120.551 | 121.424 |
|  | A(19-20-2)  | 122.734 | 124.101 |
|  | A(22-23-24) | 105.508 | 106.168 |
|  | A(23-24-25) | 127.261 | 126.619 |
|  | A(24-25-26) | 110.804 | 109.471 |
|  | A(24-25-27) | 110.812 | 109.48  |
|  | A(24-25-28) | 109.672 | 109.467 |
|  | A(26-25-27) | 107.201 | 109.474 |
|  | A(26-25-28) | 109.15  | 109.462 |
|  | A(27-25-28) | 109.146 | 109.473 |
|  | A(30-29-37) | 120.481 | 120.979 |
|  | A(29-30-31) | 119.53  | 120.275 |
|  | A(29-30-32) | 119.389 | 119.443 |
|  | A(29-37-35) | 120.023 | 119.477 |
|  | A(29-37-38) | 119.881 | 120.267 |
|  | A(31-30-32) | 121.08  | 120.282 |
|  | A(30-32-33) | 120.524 | 120.208 |
|  | A(30-32-34) | 119.755 | 119.577 |
|  | A(33-32-34) | 119.714 | 120.215 |
|  | A(32-34-35) | 121.216 | 121.301 |
|  | A(34-35-36) | 119.751 | 120.429 |
|  | A(34-35-37) | 119.133 | 119.154 |
|  | A(36-35-37) | 121.115 | 120.418 |
|  | A(35-37-38) | 120.096 | 120.256 |
|  | A(40-42-43) | 121.992 | 121.735 |
|  | A(40-42-44) | 116.041 | 116.533 |
|  | 42-44)      | 121.966 | 121.732 |
|  | 44-45)      | 121.075 | 118.444 |

<sup>a</sup>Atom numbering refer to **Fig. 6**

**Table S2** The calculated natural charges of **5<sup>a</sup>**.

| Atom | Charge  | Atom | Charge  |
|------|---------|------|---------|
| S1   | 2.3582  | C25  | -0.7226 |
| O2   | -0.6363 | H26  | 0.2560  |
| O3   | -0.9475 | H27  | 0.2555  |
| O4   | -0.9180 | H28  | 0.2655  |
| N5   | -0.4512 | C29  | 0.1615  |
| N6   | -0.2774 | C30  | -0.2551 |
| N7   | -0.2271 | H31  | 0.2684  |
| N8   | -0.1650 | C32  | -0.1952 |
| N9   | -0.3446 | H33  | 0.2721  |
| N10  | -0.8910 | C34  | -0.3465 |
| N11  | -0.5071 | C35  | -0.1873 |
| N12  | -0.5157 | H36  | 0.2817  |
| C13  | 0.0286  | C37  | -0.2574 |
| H14  | 0.2286  | H38  | 0.2508  |
| C15  | -0.2934 | C39  | 0.5956  |
| H16  | 0.2460  | C40  | 0.0658  |
| C17  | -0.1961 | H41  | 0.2358  |
| H18  | 0.2471  | C42  | -0.3494 |
| C19  | -0.2912 | H43  | 0.2543  |
| H20  | 0.2738  | C44  | 0.0679  |
| C21  | 0.3844  | H45  | 0.2344  |
| C22  | 0.6173  | H46  | 0.4409  |
| C23  | 0.0189  | H47  | 0.4617  |
| C24  | 0.2043  |      |         |

<sup>a</sup>Atom numbering refer to **Fig. 6**
